# Supplementary material for: Observations of Agonistic Behavior between Two Male Gobies Acentrogobius virgatulus (Jordan & Snyder, 1901), in Maizuru Bay, Kyoto Prefecture, Japan
Source: Hindawi journal article supplement (doi:10.1155/2023/8868453), 2023-04-24
Supplement: f1 [file 8868453.f1.docx]

**Observations of agonistic behavior between two** **male gobies *Acentrogobius virgatulus* (Jordan & Snyder, 1901), in Maizuru Bay, Kyoto Prefecture, Japan.**

Hunter Harter Godfrey*1 and Yumi Henmi1

Number of ESM: video: 2

**Please refer to the following google drive link for ESM referenced in this paper.**

<https://drive.google.com/drive/folders/1kTxS0xiGhmcbs5u6RgxDa_fdkR9Ogffs>

**Supplementary Information**

ESM Video S1: Agonistic interaction between two *Acentrogobius virgatulus* (Gobiidae), in Maizuru Bay, Kyoto Prefecture, Japan recorded on 23 June 2022.

ESM Video S2: Agonistic threat displays between two *Acentrogobius virgatulus* (Gobiidae), in Maizuru Bay, Kyoto Prefecture, Japan recorded 25 July 2022.
